# Supplementary material for: Uncovered variability in olive moth (Prays oleae) questions species monophyly
Source: PubMed Central journal article supplement (PMC6261264; doi:10.1371/journal.pone.0207716), 2018-11-26
Supplement: pone.0207716.s003.pdf [file pone.0207716.s003.pdf]

**Supplemental information**  
**Uncovered variability in olive moth (*Prays oleae*)**  
**questions species monophyly**

Tânia Nobre<sup>(1)\*</sup>, Luis Gomes<sup>(1)</sup>, Fernando Trindade Rei<sup>(1)</sup>

<sup>(1)</sup> Laboratory of Entomology, ICAAM, University of Évora

\* Corresponding author: [tnobre@uevora.pt](mailto:tnobre@uevora.pt)

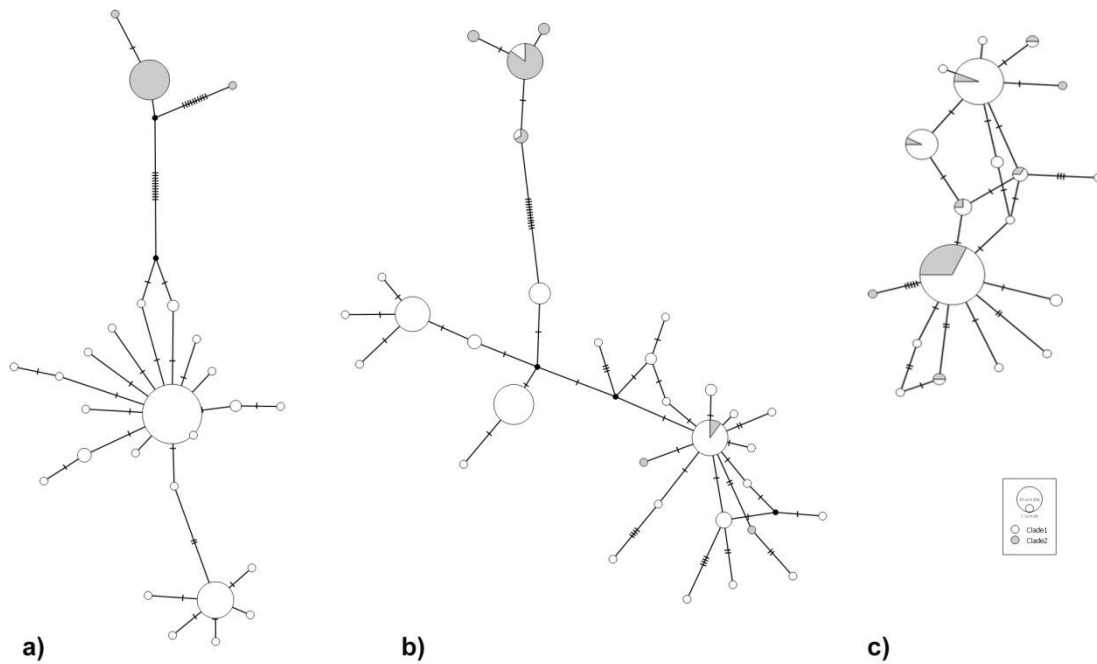

**S3 Fig:** TCS haplotype networks of sampled specimens, considering a) the mitochondrial marker COI, b) the mitochondrial marker nad5, and c) the nuclear marker Rps5. Each circle represents a sequence; the size of the circle is proportional to number of individuals with a particular haplotype sequence. The connections are mutational steps between individuals. The grey colour shows the proportion of individuals on clade 2 based on the COI amplicon (Fig 2).
