# Supplementary material for: Uncovered variability in olive moth (Prays oleae) questions species monophyly
Source: PubMed Central journal article supplement (PMC6261264; doi:10.1371/journal.pone.0207716), 2018-11-26
Supplement: pone.0207716.s004.pdf [file pone.0207716.s004.pdf]

**Supplemental information**  
**Uncovered variability in olive moth (*Prays oleae*)**  
**questions species monophyly**

Tânia Nobre<sup>(1)\*</sup>, Luis Gomes<sup>(1)</sup>, Fernando Trindade Rei<sup>(1)</sup>

<sup>(1)</sup> Laboratory of Entomology, ICAAM, University of Évora

\* Corresponding author: [tnobre@uevora.pt](mailto:tnobre@uevora.pt)

**S1 Table:** Sampled locations and geographical coordinates. Locations with alphabetic code only were sampled by local associations and/or by the Regional Directorates for Agriculture.

| Closest locality      | Coord X   | Coord y   | Code        | Region |
|-----------------------|-----------|-----------|-------------|--------|
| Baleizão              | -7.708961 | 38.013240 | <b>P15</b>  | South  |
| Telheiro              | -7.398881 | 38.448920 | <b>P86</b>  | South  |
| Ervidel               | -8.097120 | 37.945810 | <b>P4</b>   | South  |
| Mina do Bugalho       | -7.328936 | 38.667503 | <b>P139</b> | South  |
| Moura                 | -7.425753 | 38.156567 | <b>P52</b>  | South  |
| Vila de Frades        | -7.856793 | 38.198422 | <b>P61</b>  | South  |
| Odivelas              | -8.143498 | 38.166765 | <b>P71</b>  | South  |
| Vila Verde de Ficalho | -7.316707 | 37.944818 | <b>P24</b>  | South  |
| Vila Fernando         | -7.320529 | 38.915488 | <b>P170</b> | South  |
| Évora Monte           | -7.717580 | 38.772255 | <b>P129</b> | South  |
| Campo Maior           | -7.080551 | 39.011178 | <b>P180</b> | South  |
| Ervedal               | -7.807832 | 39.039536 | <b>P162</b> | South  |
| Cabeção               | -8.069177 | 38.948084 | <b>P149</b> | South  |
| Couço                 | -8.361094 | 38.995884 | <b>P155</b> | South  |
| São Manços            | -7.762467 | 38.455650 | <b>P79b</b> | South  |
| Arraiolos             | -7.989730 | 38.718441 | <b>P119</b> | South  |
| Sarzedas              | -7.663531 | 39.872450 | <b>SAR</b>  | Center |
| Sobreira Formosa      | -7.835537 | 39.749912 | <b>GSF</b>  | Center |
| Castelo Novo          | -7.477043 | 40.073788 | <b>CNV</b>  | Center |
| Lamaçais              | -7.404250 | 40.306381 | <b>LMC</b>  | Center |
| Pinhel                | -7.111541 | 40.727906 | <b>PNH</b>  | North  |
| Meda                  | -7.275059 | 40.951070 | <b>MDA</b>  | North  |
| Vilar Torpim          | -7.002735 | 40.901195 | <b>VTM</b>  | North  |
| Mogadouro             | -6.512559 | 41.308013 | <b>MGD</b>  | North  |
| S. Salvador           | -7.193772 | 41.535096 | <b>SSR</b>  | North  |
| F.E.Cinta             | -7.431884 | 41.049872 | <b>FEC</b>  | North  |
| Torre Moncorvo        | -7.041674 | 41.554825 | <b>TMC</b>  | North  |
| Sendim da Ribeira     | -6.899215 | 41.327122 | <b>SRB</b>  | North  |
| F. Mercê              | -7.325467 | 41.540939 | <b>FMC</b>  | North  |
| Izeda                 | -6.694296 | 41.561408 | <b>IZD</b>  | North  |
| Cobro                 | -7.246815 | 41.414660 | <b>CBR</b>  | North  |
| Paradela              | -7.120856 | 41.554680 | <b>PDL</b>  | North  |
| M. Caval / Castelões  | -6.937525 | 41.514888 | <b>MCL</b>  | North  |
