# Supplementary material for: Uncovered variability in olive moth (Prays oleae) questions species monophyly
Source: PubMed Central journal article supplement (PMC6261264; doi:10.1371/journal.pone.0207716), 2018-11-26
Supplement: pone.0207716.s005.pdf [file pone.0207716.s005.pdf]

**Supplemental information**  
**Uncovered variability in olive moth (*Prays oleae*)**  
**questions species monophyly**

Tânia Nobre<sup>(1)\*</sup>, Luis Gomes<sup>(1)</sup>, Fernando Trindade Rei<sup>(1)</sup>

<sup>(1)</sup> Laboratory of Entomology, ICAAM, University of Évora

\* Corresponding author: [tnobre@uevora.pt](mailto:tnobre@uevora.pt)

**S2 Table:** GenBank accession numbers of the sequences obtained in this study. Code corresponds to the location code as in Table 1 followed by specimen number.

| Code | *   | COI      | nad5     | RpS5     |
|------|-----|----------|----------|----------|
| CBR1 | H1  | MH536341 | MH536482 | MH550668 |
| CBR2 | H1  | MH536342 | MH536479 | MH550735 |
| CBR3 | H1  | MH536343 | MH536482 | MH550736 |
| CBR5 | H1  | MH536344 | MH536505 | MH550737 |
| CBR6 | H13 | MH536446 | MH536482 | MH550669 |
| CNV4 | H17 | MH536411 | MH536477 | MH550670 |
| CNV5 | H1  | MH536345 | MH536477 | MH550671 |
| CNV6 | H1  | MH536346 | MH536486 | MH550672 |
| FEC2 | H15 | MH536420 | MH536482 | MH550738 |
| FEC3 | H1  | MH536347 | MH536482 | MH550673 |
| FEC4 | H1  | MH536348 | MH536473 | MH550739 |
| FEC5 | H1  | MH536349 | MH536473 | MH550674 |
| FEC6 | H16 | MH536350 | MH536493 | MH550740 |
| FMC2 | H1  | MH536353 | MH536477 | MH550741 |
| FMC3 | H13 | MH536447 | MH536502 | MH550675 |
| FMC4 | H9  | MH536412 | MH536495 | MH550742 |
| GSF1 | H1  | MH536354 | MH536477 | MH550743 |
| GSF2 | H1  | MH536355 | MH536482 | MH550744 |
| GSF3 | H1  | MH536356 | MH536487 | MH550676 |
| GSF4 | H1  | MH536357 | MH536476 | MH550677 |
| GSF6 | H13 | MH536448 | MH536504 | MH550745 |
| IZD1 | H13 | MH536449 | MH536502 | MH550678 |
| IZD2 | H15 | MH536421 | MH536473 | MH550746 |
| IZD3 | H10 | MH536410 | MH536477 | MH550747 |
| IZD5 | H1  | MH536358 | MH536476 | MH550748 |
| IZD6 | H1  | MH536359 | MH536482 | MH550749 |
| LMC1 | H1  | MH536360 | MH536501 | MH550679 |
| LMC2 | H18 | MH536361 | MH536477 | MH550750 |
| LMC3 | H2  | MH536415 |          |          |
| LMC4 | H1  | MH536362 | MH536482 | MH550751 |
| LMC5 | H1  | MH536363 | MH536495 | MH550752 |
| LMC6 | H1  | MH536364 | MH536486 | MH550680 |
| MCL1 | H13 | MH536450 | MH536502 | MH550753 |
| MCL2 | H13 | MH536451 | MH536502 | MH550754 |
| MCL3 | H15 | MH536422 | MH536473 | MH550755 |

| Code  | *          | COI      | nad5     | RpS5     |
|-------|------------|----------|----------|----------|
| MDA3  | <i>H19</i> | MH536365 | MH536500 | MH550756 |
| MDA4  | <i>H1</i>  | MH536367 | MH536474 | MH550757 |
| MDA5  | <i>H4</i>  | MH536368 | MH536486 | MH550681 |
| MDA6  | <i>H1</i>  | MH536369 | MH536477 | MH550758 |
| MGD1  | <i>H15</i> | MH536423 | MH536473 | MH550682 |
| MGD2  | <i>H15</i> | MH536424 | MH536473 | MH550683 |
| MGD6  | <i>H1</i>  | MH536370 | MH536498 | MH550684 |
| P119A | <i>H6</i>  | MH536371 | MH536477 | MH550759 |
| P119B | <i>H1</i>  | MH536372 | MH536482 | MH550685 |
| P119D | <i>H1</i>  | MH536413 | MH536484 | MH550791 |
| P119E | <i>H1</i>  | MH536373 | MH536474 | MH550686 |
| P129A | <i>H1</i>  | MH536442 | MH536473 | MH550687 |
| P129C | <i>H15</i> | MH536425 | MH536473 | MH550688 |
| P129F | <i>H15</i> | MH536426 | MH536473 | MH550689 |
| P139A | <i>H1</i>  | MH536374 | MH536477 | MH550760 |
| P139C | <i>H16</i> | MH536351 | MH536486 | MH550761 |
| P139D | <i>H13</i> | MH536452 | MH536492 | MH550690 |
| P139E | <i>H20</i> | MH536443 | MH536502 | MH550691 |
| P139F | <i>H1</i>  | MH536375 | MH536473 | MH550692 |
| P155A | <i>H1</i>  | MH536376 | MH536502 | MH550762 |
| P15A  | <i>H1</i>  | MH536377 | MH536482 | MH550763 |
| P15B  | <i>H13</i> | MH536453 | MH536502 | MH550732 |
| P15E  | <i>H13</i> | MH536454 | MH536502 | MH550693 |
| P15F  | <i>H1</i>  | MH536378 | MH536477 | MH550764 |
| P162B | <i>H15</i> | MH536427 | MH536473 | MH550765 |
| P162D | <i>H1</i>  | MH536428 | MH536473 | MH550766 |
| P170D | <i>H1</i>  | MH536379 | MH536482 | MH550694 |
| P170E | <i>H1</i>  | MH536380 | MH536496 | MH550767 |
| P170F | <i>H13</i> | MH536455 | MH536502 | MH550695 |
| P180A | <i>H1</i>  | MH536381 | MH536491 | MH550768 |
| P180B | <i>H3</i>  | MH536382 | MH536481 |          |
| P180C | <i>H1</i>  | MH536383 | MH536477 | MH550696 |
| P180D | <i>H21</i> | MH536409 | MH536482 | MH550769 |
| P180F | <i>H1</i>  | MH536384 | MH536477 | MH550697 |
| P24B  | <i>H13</i> | MH536456 | MH536502 | MH550698 |
| P24C  | <i>H22</i> | MH536385 | MH536484 | MH550770 |
| P24D  | <i>H1</i>  | MH536386 | MH536485 | MH550699 |
| P24E  | <i>H23</i> | MH536444 | MH536475 | MH550700 |
| P24F  | <i>H1</i>  | MH536387 | MH536482 | MH550787 |
| P4A   | <i>H1</i>  | MH536388 | MH536474 | MH550771 |
| P4C   | <i>H13</i> | MH536457 | MH536504 | MH550772 |
| P4D   | <i>H1</i>  | MH536389 | MH536483 | MH550773 |
| P52D  | <i>H13</i> | MH536458 | MH536488 | MH550701 |
| P52E  | <i>H1</i>  | MH536414 | MH536477 | MH550702 |
| P52F  | <i>H12</i> | MH536459 | MH536482 | MH550703 |
| P61A  | <i>H15</i> | MH536429 | MH536502 | MH550774 |

| Code  | *   | COI      | nad5     | RpS5     |
|-------|-----|----------|----------|----------|
| P61B  | H1  | MH536390 | MH536477 | MH550775 |
| P61D  | H1  | MH536391 | MH536502 |          |
| P61E  | H11 | MH536392 | MH536477 | MH550704 |
| P61F  | H1  | MH536417 | MH536482 | MH550705 |
| P71A  | H24 | MH536393 | MH536482 | MH550706 |
| P71C  | H19 | MH536366 | MH536477 | MH550707 |
| P71E  | H1  | MH536394 | MH536482 | MH550708 |
| P79bA | H15 | MH536430 | MH536473 | MH550709 |
| P79bB | H1  | MH536395 | MH536474 | MH550794 |
| P79bC | H13 | MH536460 | MH536502 | MH550796 |
| P79bD | H13 | MH536461 | MH536502 | MH550710 |
| P79bE | H8  | MH536418 | MH536494 | MH550776 |
| P79bF | H1  | MH536396 | MH536477 | MH550711 |
| P86A  | H25 | MH536419 | MH536476 | MH550712 |
| P86B  | H15 | MH536431 | MH536473 | MH550713 |
| P86C  | H26 | MH536397 | MH536482 | MH550777 |
| P86D  | H11 | MH536398 | MH536482 | MH550714 |
| P86E  | H1  | MH536399 | MH536489 | MH550778 |
| PDL1  | H14 | MH536472 | MH536502 | MH550715 |
| PDL2  | H13 | MH536462 | MH536502 | MH550792 |
| PDL3  | H1  | MH536400 | MH536480 | MH550779 |
| PDL5  | H1  | MH536401 | MH536478 | MH550733 |
| PDL6  | H1  | MH536402 | MH536497 | MH550793 |
| PNH1  | H5  | MH536445 | MH536473 | MH550780 |
| PNH2  | H16 | MH536352 | MH536490 | MH550716 |
| PNH3  | H1  | MH536403 | MH536474 | MH550717 |
| PNH4  | H5  | MH536416 |          |          |
| PNH5  | H1  | MH536404 | MH536477 | MH550718 |
| PNH6  | H15 | MH536432 | MH536473 | MH550734 |
| SAR1  | H15 | MH536433 | MH536473 | MH550719 |
| SAR2  | H15 | MH536436 | MH536473 | MH550781 |
| SAR3  | H7  | MH536435 | MH536473 | MH550720 |
| SAR4  | H13 | MH536463 | MH536502 | MH550721 |
| SAR5  | H15 | MH536434 | MH536473 | MH550782 |
| SRB3  | H1  | MH536405 | MH536474 | MH550783 |
| SRB5  | H13 | MH536464 | MH536502 | MH550722 |
| SRB6  | H15 | MH536437 | MH536473 | MH550784 |
| SSR2  | H1  | MH536406 | MH536477 | MH550785 |
| SSR3  | H1  | MH536407 | MH536482 | MH550723 |
| SSR4  | H13 | MH536465 | MH536505 | MH550724 |
| SSR5  | H13 | MH536466 | MH536505 | MH550725 |
| SSR6  | H15 | MH536438 | MH536473 | MH550726 |
| TMC1  | H13 | MH536467 | MH536502 | MH550727 |
| TMC5  | H13 | MH536468 | MH536502 | MH550728 |
| TMC6  | H13 | MH536469 | MH536503 | MH550729 |
| VTM1  | H15 | MH536439 | MH536473 | MH550730 |

| Code | *          | COI      | nad5     | RpS5     |
|------|------------|----------|----------|----------|
| VTM2 | <i>H13</i> | MH536471 | MH536502 | MH550731 |
| VTM3 | <i>H15</i> | MH536441 | MH536473 | MH550788 |
| VTM4 | <i>H15</i> | MH536440 | MH536473 | MH550795 |
| VTM5 | <i>H13</i> | MH536470 | MH536503 | MH550789 |
| VTM6 | <i>H1</i>  | MH536408 | MH536474 | MH550790 |

\* Fig 2 (main text) haplotypes
