# Supplementary material for: Uncovered variability in olive moth (Prays oleae) questions species monophyly
Source: PubMed Central journal article supplement (PMC6261264; doi:10.1371/journal.pone.0207716), 2018-11-26
Supplement: pone.0207716.s006.pdf [file pone.0207716.s006.pdf]

**Supplemental information**  
**Uncovered variability in olive moth (*Prays oleae*)**  
**questions species monophyly**

Tânia Nobre<sup>(1)\*</sup>, Luis Gomes<sup>(1)</sup>, Fernando Trindade Rei<sup>(1)</sup>

<sup>(1)</sup> Laboratory of Entomology, ICAAM, University of Évora

\* Corresponding author: [tnobre@uevora.pt](mailto:tnobre@uevora.pt)

**S3 Table:** Variables analysed, including bioclimatic and land cover derived maps

| <b>Cod.</b>  | <b>Description of variables</b>                                  | <b>Retained*</b> | <b>Source</b> |
|--------------|------------------------------------------------------------------|------------------|---------------|
| <b>DisOG</b> | Distance to homogeneous olive groves (> 1 ha)                    | x                | [1]           |
| <b>DenOG</b> | Density of olive groves per km <sup>2</sup>                      | x                | [1]           |
| <b>DisRG</b> | Distance to riparian gallery                                     | x                | [1]           |
| <b>Tmax</b>  | mean temperature of the warmest month of the year                | x                | [2]           |
| <b>Tmin</b>  | mean temperature of the coldest month of the year                | x                | [2]           |
| <b>Tp</b>    | Annual positive temperature                                      | x                | [2]           |
| <b>Pp</b>    | Positive precipitation                                           |                  | [2]           |
| <b>M</b>     | mean maximum temperature of coldest month                        | x                | [2]           |
| <b>m</b>     | mean minimum temperature of the coldest month                    | x                | [2]           |
| <b>Ic</b>    | Simple continentality index                                      | x                | [2]           |
| <b>It</b>    | Thermicity index                                                 | x                | [2]           |
| <b>Itc</b>   | Compensated thermicity index                                     | x                | [2]           |
| <b>los4</b>  | Ombrothermic index of the summer quarter plus the previous month |                  | [2]           |
| <b>los2</b>  | Ombrothermic index of the warmest bimonth of the summer quarter  |                  | [2]           |
| <b>los3</b>  | Ombrothermic index of the summer quarter                         |                  | [2]           |

| <b>Cod.</b>      | <b>Description of variables</b>                                                                                                            | <b>Retained*</b> | <b>Source</b> |
|------------------|--------------------------------------------------------------------------------------------------------------------------------------------|------------------|---------------|
| <b>Io</b>        | Annual ombrothermic index                                                                                                                  |                  | [2]           |
| <b>Mac05</b>     | Macrobioclimates (Rivas-Martínez 2005)                                                                                                     | x                | [2]           |
| <b>Mac07</b>     | Macrobioclimates (Rivas-Martínez 2007)                                                                                                     |                  | [2]           |
| <b>Mac0811</b>   | Macrobioclimates (Rivas-Martínez 2008,2011)                                                                                                |                  | [2]           |
| <b>MB05</b>      | Macrobioclimates and bioclimatic variants (Rivas-Martínez 2005)                                                                            |                  | [2]           |
| <b>MB07</b>      | Macrobioclimates and bioclimatic variants (Rivas-Martínez 2007)                                                                            |                  | [2]           |
| <b>MB00811</b>   | Macrobioclimates and bioclimatic variants (Rivas-Martínez 2008, 2011)                                                                      |                  | [2]           |
| <b>Bio05</b>     | Bioclimates (Rivas-Martínez 2005)                                                                                                          |                  | [2]           |
| <b>Bio07</b>     | Bioclimates (Rivas-Martínez 2007)                                                                                                          |                  | [2]           |
| <b>Bio0811</b>   | Bioclimates (Rivas-Martínez 2008, 2011)                                                                                                    |                  | [2]           |
| <b>Mac05C</b>    | Macrobioclimates (highlighting vernal-aestival indices compensation) (Rivas-Martínez 2005)                                                 |                  | [2]           |
| <b>Mac07C</b>    | Macrobioclimates (highlighting vernal-aestival indices compensation) (Rivas-Martínez 2007)                                                 |                  | [2]           |
| <b>Mac0811C</b>  | Macrobioclimates (highlighting vernal-aestival indices compensation) (Rivas-Martínez 2008, 2011)                                           | x                | [2]           |
| <b>Mac05Cc</b>   | Macrobioclimates (highlighting vernal-aestival indices compensation considering the annual ombrothermic index) (Rivas-Martínez 2005)       |                  | [2]           |
| <b>Mac07Cc</b>   | Macrobioclimates (highlighting vernal-aestival indices compensation considering the annual ombrothermic index) (Rivas-Martínez 2007)       |                  | [2]           |
| <b>Mac0811Cc</b> | Macrobioclimates (highlighting vernal-aestival indices compensation considering the annual ombrothermic index) (Rivas-Martínez 2007, 2011) |                  | [2]           |
| <b>Ic05</b>      | Simple continentality (Rivas-Martínez 2005)                                                                                                |                  | [2]           |
| <b>Ic070811</b>  | Simple continentality (Rivas-Martínez 2007, 2008, 2011)                                                                                    | x                | [2]           |
| <b>Ther05</b>    | Thermotypes (Rivas-Martínez 2005)                                                                                                          |                  | [2]           |
| <b>Ther07</b>    | Thermotypes (Rivas-Martínez 2007)                                                                                                          |                  | [2]           |

| <b>Cod.</b>      | <b>Description of variables</b>                                                                          | <b>Retained*</b> | <b>Source</b> |
|------------------|----------------------------------------------------------------------------------------------------------|------------------|---------------|
| <b>Ther0811</b>  | Thermotypes (Rivas-Martínez 2008, 2011)                                                                  | x                | [2]           |
| <b>Omb</b>       | Ombrotypes                                                                                               |                  | [2]           |
| <b>PpDY</b>      | Positive precipitation for dry year – it corresponds to precipitation for dry year of Nicolau (2002)     |                  | [2]           |
| <b>PpHY</b>      | Positive precipitation for humid year – it corresponds to precipitation for humid year of Nicolau (2002) | x                | [2]           |
| <b>EqOtDY</b>    | Equivalent ombrothermic index for dry year                                                               |                  | [2]           |
| <b>EqOtHY</b>    | Equivalent ombrothermic index for humid year                                                             |                  | [2]           |
| <b>EqOtypeDY</b> | Equivalent ombrotypes for dry year                                                                       |                  | [2]           |
| <b>EqOtypeHY</b> | Equivalent ombrotypes for humid year                                                                     |                  | [2]           |
| <b>OAnoDY</b>    | Ombrothermic index anomaly for dry year                                                                  |                  | [2]           |
| <b>OAnoHY</b>    | Ombrothermic index anomaly for humid year                                                                |                  | [2]           |

\* X indicate variables retained after covariate correlation check

[1] Obtained by GIS analysis based on Portuguese landcover cartography (IGEO, 2016)

[2] Monteiro-Henriques T, Martins MJ, Cerdeira JO, Silva P, Arsénio P, Silva, et al. Bioclimatological mapping tackling uncertainty propagation: Application to mainland Portugal. *Int J Climatol.* 2016;36: 400–411. doi:10.1002/joc.4357
